# Supplementary material for: Increased mTORC1 activation in salivary gland B cells and T cells from patients with Sjögren’s syndrome: mTOR inhibition as a novel therapeutic strategy to halt immunopathology?
Source: PubMed Central journal article supplement — RMD Open. 2019 Jan 11;5(1):e000701. doi: 10.1136/rmdopen-2018-000701 (PMC6340518; doi:10.1136/rmdopen-2018-000701), 2019-01-11
Supplement: rmdopen-2018-000701supp009.pdf [file rmdopen-2018-000701supp009.pdf]

1 **Supplementary table 1. Patients' characteristics.**

2

|                                                   | Gene expression          |                |                | Immunofluorescence    |                |
|---------------------------------------------------|--------------------------|----------------|----------------|-----------------------|----------------|
|                                                   | peripheral blood B cells |                |                | labial salivary gland |                |
|                                                   | HC<br>(n=9)              | nSS<br>(n=17)  | pSS<br>(n=13)  | nSS<br>(n=6)          | pSS<br>(n=12)  |
| Gender (female %)                                 | 100                      | 100            | 77             | 100                   | 100            |
| Age (yr)                                          | 57±5                     | 53±15          | 52±12          | 40±18                 | 48±11          |
| Anti-Ro/SSA+ (%)                                  | NA                       | 41             | 62             | 0                     | 100            |
| Anti-La/SSB+ (%)                                  | NA                       | 0              | 38             | 0                     | 50             |
| LFS (foci/4mm <sup>2</sup> )                      | NA                       | 0              | 1.8±1.1        | 0                     | 3.7±2.5        |
| IgG and IgM+ plasma<br>cells in LSG biopsy<br>(%) | NA                       | 31±14          | 52±19          | 20±7                  | 54±18          |
| Serum IgG (g/L)                                   | NA                       | 11.2±2.9       | 17.1±9.3       | 9.7±2.6               | 20.1±9.1       |
| ESR (mm/h)                                        | NA                       | 14±12          | 15±12          | 17±9                  | 38±25          |
| <u>Schirmer (mm/5min)</u>                         | <u>NA</u>                | <u>5.9±7.2</u> | <u>5.8±9.0</u> | <u>13.8±15.9</u>      | <u>5.9±6.0</u> |
| ESSDAI (0-123)                                    | NA                       | NA             | 4±6            | NA                    | NA             |
| ESSPRI (0-10)                                     | NA                       | NA             | 5±3            | NA                    | NA             |

3

4 HC: healthy controls; nSS: non-Sjögren's sicca; pSS: primary Sjögren's syndrome; LFS:

5 lymphocytic focus score; LSG: labial salivary gland; ESR: erythrocyte sedimentation rate;

6 ESSDAI: EULAR Sjögren's syndrome disease activity index; ESSPRI: EULAR Sjögren's

1  
2  
3  
4  
5  
6  
7  
8  
9  
10  
11  
12  
13  
14  
15  
16  
17  
18  
19  
20  
21  
22  
23  
24  
25  
26  
27  
28  
29  
30  
31  
32  
33  
34  
35  
36  
37  
38  
39  
40  
41  
42  
43  
44  
45  
46  
47  
48  
49  
50  
51  
52  
53  
54  
55  
56  
57  
58  
59  
60

1 syndrome patient reported index. Data represent Mean±SD unless specified differently. At  
2 the time that the biopsies of the immunofluorescence cohort were taken, ESSDAI and  
3 ESSPRI were not published, and therefore these are not shown.

Confidential: For Review Only
